# Supplementary material
Source: publisher figshare collection journal article supplement (https://brill.figshare.com/ndownloader/files/14478980)
Supplement: Supplementary file 1 [file 14478980]

Lecture 6

**Metonymy: a new look**

**A definition of metonymy**

(a) I’m reading *Shakespeare*.

America doesn’t want another *Pearl Harbor*.

*Washington* is negotiating with *Moscow*.

*Nixon* bombed Hanoi.

We need a better *glove* at third base.

(b) Shakespeare was a literary genius.

We traveled to Pearl Harbor last year.

Washington is the capital of the United States.

Nixon is a former American president.

This glove is too tight for me.

(c) I’m reading *one of Shakespeare’s works*.

America doesn’t want another *major defeat in war*.

*The American government* is negotiating with *the Russian*

*government*.

*American bombers* bombed Hanoi.

We need a better *baseball player* at third base.

the producer for the product (the author for the work)

I’m reading *Shakespeare*.

She loves *Picasso*.

Does he own any *Hemingway?*

the place for the event

America doesn’t want another *Pearl Harbor*.

Let’s not let *El Salvador* become another *Vietnam*.

*Watergate* changed our politics.

the place for the institution

*Washington* is negotiating with *Moscow*.

The *White House* isn’t saying anything.

*Wall Street* is in a panic.

*Hollywood* is putting out terrible movies.

the controller for the controlled

*Nixon* bombed Hanoi.

*Ozawa* gave a terrible concert last night.

an object used for the user

We need a better *glove* at third base.

The *sax* has the flu today.

part for whole (as in, “We need some good *heads* on the project”); whole for the part (as in, “*America* is a powerful country”); instrument for action (as in, “She *shampooed* her hair”); effect for cause (as in, “It’s a *slow* road”); place for action (as in, “America doesn’t want another *Pearl Harbor*”); destination for motion (as in, “He *porched* the newspaper”); place for product (as in, “Give me my *java/mocha”*); time for an object (as in, “The *8:40* just arrived”); and many others.

*vehicle entity* - *target entity*.

Closeness – contiguity

Metonymy is a cognitive process in which one conceptual entity, the vehicle, provides mental access to another conceptual entity, the target, within the same domain, or idealized cognitive model (ICM).

**A problem with the definition**

He is in low spirits. (sadness)

She is feeling up. (happiness)

He is a hothead. (anger)

Are these metaphoric or metonymic expressions?

Same frame – different frame

sad is down, happy is up, and anger is heat.

the downward orientation of the body for sadness, the upward orientation of the body for happiness, and an increase in body temperature for anger.

Sadness: drooping body posture, mouth turned down, etc. – generalization - “downward bodily orientation.” “effect for cause” - specific metonymy downward bodily orientation for sadness. inside the sadness frame.

Metaphor: downward bodily orientation – generalization - down(ward).

divorced and distinct from the actual responses inside the sadness frame.

it can function as a metaphorical source domain for sadness, yielding: sadness is down.

intimacy is closeness. we can conceptualize it as metonymy.

physical closeness between two people for intimacy.

physical closeness between two people element is a part of a functional domain, the intimacy frame, we have to do with metonymy.

primary metaphors can also be conceived of as metonymies. intimacy is closeness: as a metonymy: physical closeness between two people for intimacy.

*Visual monitoring  control.* The basis for this metaphor is probably the fact that guarding or keeping control often *involves* visual monitoring of the controlled entity; and the limited domain of physical vision is further *analogou*s to the domain of personal influence of control. … (1990: 32-33; Steen’s emphases)

*Physical vision  mental “vision.”* This metaphor is probably based on the strong *connection* between sight and knowledge, and also on the *shared structural properties* of the visual and intellectual domains—our ability to focus our mental and visual attentions, to monitor stimuli mentally and visually. (1990: 33; Steen’s emphases)

frame-based and similarity-based domains.

“visual monitoring” and “control;” “seeing” and “knowledge.”

How can we characterize such examples as above as metonymic?

vision and control.

Metonymy: visual monitoring for guarding (or other kinds of control).

Metaphor: visual monitoring is a kind of seeing - guarding is a kind of control - control is seeing, seeing and control are in distant parts of the conceptual system (perception vs. social relationships, or the like).

**The neural theory of metaphor and metonymy**

the extension of metaphor from language (linguistic metaphors) to mind (conceptual metaphors) to body (bodily basis of metaphor) and to brain.

Neural bindings: two or more conceptual entities are taken to be a single entity: color and space - a blue square.

different types of neural circuits. “linking circuit” - **metonymy**.

“Two-way linking circuits” - words and grammatical constructions (form and meaning).

“mapping circuit” – metaphor.

**A new definition**

Mapping in metaphor, metonymy and mental spaces.

Mappings: a connection between two conceptual entities.

Nature of connection: same or different.

Metonymy: “through-connection.”

Metaphor: “as-if-connection.”

Mental spaces: “is-connection.”

“Through-connections”: “outward-looking” and “inward-looking.”

outward-looking mappings: activate an entity that is outside the “primary domain.”

“I bought another *Hemingway*” points to a “secondary domain,” which is his books.

inward-looking metonymies activate something inside their primary domain.

“This *book* is large.” The word *book*: primary domains: physical object, semantic content, and so on.

Books are physical objects: shape, size, color, and so on. Mapping: inward-looking.

gradient of “primariness:” semantic content just as primary as physical object?

“This *book* is complicated” inward- or an outward-looking mapping?

Outward-looking mappings either refer to an entity or highlight an aspect of a concept.

an outward-looking mapping referring to an entity is “I bought another *Hemingway*”

highlight an aspect: “This *book* is complicated”

inward-looking metonymic mappings only highlight an aspect: “This *book* is large”

inward-looking metonymies include “active zone” phenomena: “This *book* is large” “I admire *Hemingway*”

Does this mean that all nominal metonymies such as those we have seen for *Hemingway* and *book* are active zone phenomena and, consequently, metonymic?

shift in meaning: “I admire *Hemingway*” would not be metonymy – it does not also conventionally mean “authorial qualities.”

But: “I bought another *Hemingway*”; names of authors in general can be conventionally used to indicate (mean) their books.

I do not think that a shift in conventional meaning is a criterion of metonymy.

Metonymy can occur without it. - a shift in imagery associated with an item – e.g., a shift from Hemingway as author to his authorial qualities.

Momentary act of meaning specialization (i.e., a shift in imagery). - “inward-looking mapping,” which highlights an aspect of central knowledge.

In metonymy, we access entity 2 through entity 1 by means of a “through-connection.” Entity 1 and 2 are concepts (subdomains) or, in the case of entity 2, aspects of concepts, and the two are in the same ICM, or frame. The mapping can be either inward-looking or outward looking. If it is outward-looking, it can result either in entity 1 referring to entity 2 or in entity 1 highlighting an aspect of entity 2. If it is inward-looking, entity 1 highlights an aspect of the same entity.

Prototype:

There is a through-connection between entity 1 and entity 2.

Entity 1 and entity 2 are concepts (subdomains within a larger domain).

There is a pragmatic function mapping between entity 1 and entity 2 (this would ensure that the two entities are within the same frame).

The mapping between entity 1 and entity 2 is outward-looking.

Entity 1 refers to entity 2.
